# Supplementary material for: Thermophysical Properties of 1-Octyl-3-Methylimidazolium Acetate with Organic Solvents
Source: Hindawi journal article supplement (doi:10.1155/2020/6690976), 2020-12-09
Supplement: f1 [file 6690976.f1.doc]

# Supplementary Material

# Thermophysical properties of 1-octyl-3-methylimidazolium acetate with organic solvents

Fuxin Yang*, Peng Feng

*Key Laboratory of Thermo-Fluid Science and Engineering, Ministry of Education, Xi’an Jiaotong University, Xi’an, Shaanxi 710049, China*

* Corresponding author: Fuxin Yang

Tel: +86 (0)29-82663583; Fax: +86 (0)29-82663583

E-mail: fxyang@xjtu.edu.cn

### Table S1

The chemical structure and physical properties of IL [C8mim][OAc]*

| chemical structure | molar mass/g⋅mol-1 | *T*m/K | *T*onset/K |
| --- | --- | --- | --- |
| 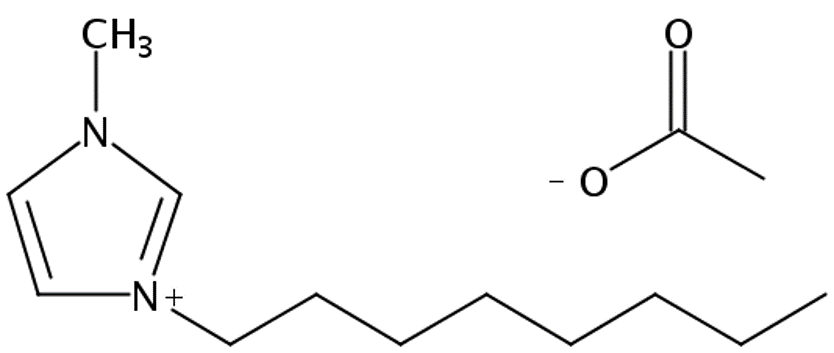 | 254.37 | 201.15 | 507.15 |

* *T*m: melting point; *T*onset: the onset decomposition temperature. Data provided by the manufacturer.

### Table S2

The parameters fitted by the experimental data in this work for Eq.(2)

| IL/Solvent | *a* / kg·m-3 | *b* / kg·m-3·K-1 | R2 |
| --- | --- | --- | --- |
| IL | 1170.1 | -0.5981 | 1 |
| DMSO | 1392.9 | -0.9979 | 1 |
| DMA | 1213.6 | -0.9288 | 1 |
| DMF | 1231.7 | -0.9631 | 1 |

### Table S3

The parameters fitted by the experimental data in this work for Eq.(5)

| Mixture | 106×*A*0 / m3·mol-1 | 107×*A*1 / m3·mol-1 | 108×*A*2 / m3·mol-1 | 107*A*3 / m3·mol-1 | AARD / % |
| --- | --- | --- | --- | --- | --- |
| IL + DMSO | | | | | |
| 303.15 | -1.840 | 6.050 | -10.94 | 9.086 | 2.3 |
| 308.15 | -1.916 | 7.011 | -10.09 | 7.451 | 2.3 |
| 313.15 | -2.004 | 7.341 | -7.980 | 7.568 | 1.8 |
| 318.15 | -2.077 | 8.081 | -9.570 | 6.470 | 1.9 |
| 323.15 | -2.176 | 8.151 | -4.129 | 6.979 | 1.7 |
| 328.15 | -2.253 | 8.954 | -4.854 | 5.748 | 1.5 |
| 333.15 | -2.332 | 9.493 | -4.858 | 5.143 | 1.5 |
| 338.15 | -2.414 | 9.808 | -4.495 | 5.274 | 1.5 |
| 343.15 | -2.519 | 10.08 | 2.933 | 5.642 | 1.3 |
| 348.15 | -2.603 | 10.97 | 0.6287 | 3.007 | 1.2 |
| IL + DMA | | | | | |
| 303.15 | -1.538 | 4.096 | 76.28 | -0.01083 | 6.1 |
| 308.15 | -1.593 | 4.149 | 80.91 | -0.1736 | 6.1 |
| 313.15 | -1.650 | 4.108 | 84.26 | -0.01742 | 6.1 |
| 318.15 | -1.712 | 4.353 | 87.65 | -0.2220 | 6.1 |
| 323.15 | -1.769 | 4.720 | 91.87 | -1.102 | 6.0 |
| 328.15 | -1.821 | 4.905 | 94.17 | -1.556 | 6.0 |
| 333.15 | -1.902 | 5.554 | 12.56 | -7.543 | 6.7 |
| 338.15 | -1.936 | 4.625 | 95.73 | -1.410 | 6.0 |
| 343.15 | -1.991 | 4.883 | 97.30 | -1.887 | 5.9 |
| 348.15 | -2.047 | 5.111 | 98.62 | -2.574 | 5.8 |
| IL + DMF | | | | | |
| 303.15 | -1.240 | 5.669 | -21.91 | 1.163 | 4.6 |
| 308.15 | -1.280 | 6.124 | -25.04 | 0.8602 | 5.0 |
| 313.15 | -1.311 | 6.535 | -30.22 | 0.5147 | 4.7 |
| 318.15 | -1.349 | 7.008 | -33.80 | 0.06651 | 4.7 |
| 323.15 | -1.382 | 7.608 | -39.33 | -0.7328 | 4.5 |
| 328.15 | -1.422 | 8.334 | -42.82 | -1.495 | 4.3 |
| 333.15 | -1.457 | 8.812 | -50.35 | -2.089 | 4.0 |
| 338.15 | -1.498 | 9.167 | -55.21 | -2.046 | 3.9 |
| 343.15 | -1.533 | 9.414 | -59.06 | -2.349 | 3.2 |
| 348.15 | -1.572 | 9.554 | -62.68 | -2.025 | 2.7 |

### Table S4

The parameters fitted by the experimental data in this work for Eq.(7)

| mixture | *C*0×105 | *C*1×104 | *C*2×104 | *C*3×105 | AARD / % |
| --- | --- | --- | --- | --- | --- |
| IL + DMSO | 8.840 | -2.108 | 2.020 | -7.994 | 0.11 |
| IL + DMA | -7.214 | 1.993 | -2.158 | 8.900 | 0.20 |
| IL + DMF | -6.341 | 2.000 | -2.455 | 10.950 | 0.22 |

### Figure S1

The deviation for DMSO between the literature density (*ρ*lit) and the calculated density (*ρ*cal) using Eq.(2) correlated using the experimental data in this work: ■ ref [22]; □ ref [23]; ● ref [24]; ○ ref [25]; ▲ ref [26]; △ ref [12]; ▼ ref [14]; ★ this work.

### Figure S2

The deviation for DMA between the literature density (*ρ*lit) and the calculated density (*ρ*cal) using Eq.(2) correlated using the experimental data in this work: ■ ref [27]; □ ref [28]; ● ref [29]; ○ ref [30]; ▲ ref [31]; △ ref [32]; ▼ ref [33]; ▽ ref [34]; ★ this work.

### Figure S3

The deviation for DMF between the literature density (*ρ*lit) and the calculated density (*ρ*cal) using Eq.(2) correlated using the experimental data in this work: ■ ref [35]; □ ref [28]; ● ref [20]; ○ ref [27]; ▲ ref [36]; △ ref [37]; ▼ ref [14]; ▽ ref [38]; ★ this work.

### Figure S4

Experimental density data of [C8mim][OAc] with organic solvent of DMSO as a function of the temperature at atmospheric pressure; *x* [C8mim][OAc]+(1- *x*)DMSO: ◼, *x*=1.000; □, *x*=0.842; ●, *x*=0.735;○, *x*=0.553; ▲, *x*=0.415; △, *x*=0.312; ▼, *x*=0.234; ▽, *x*=0.172; ◆, *x*=0.000. Dash line calculated by Eq. (2).

### Figure S5

Experimental density data of [C8mim][OAc] with organic solvent of DMA as a function of the temperature at atmospheric pressure; *x* [C8mim][OAc]+(1- *x*)DMA: ◼, *x*=1.000; □, *x*=0.861; ●, *x*=0.751;○, *x*=0.581; ▲, *x*=0.445; △, *x*=0.343; ▼, *x*=0.257; ▽, *x*=0.187; ◆, *x*=0.000. Dash line calculated by Eq. (2).

### Figure S6

Experimental density data of [C8mim][OAc] with organic solvent of DMF as a function of the temperature at atmospheric pressure; *x* [C8mim][OAc]+(1- *x*)DMF: ◼, *x*=1.000; □, *x*=0.842; ●, *x*=0.723; ○, *x*=0.530; ▲, *x*=0.407; △, *x*=0.299; ▼, *x*=0.224; ▽, *x*=0.160; ◆, *x*=0.000. Dash line calculated by Eq. (2).

### Figure S7

The deviation of DMSO between the literature viscosity (*η*lit) and the calculated viscosity (*η*cal) using Eq.(8) correlated using the experimental data in this work: ■ ref [24]; □ ref [25]; ● ref [14]; ★ this work.

### Figure S8

The deviation of DMA between the literature viscosity (*η*lit) and the calculated viscosity (*η*cal) using Eq.(8) correlated using the experimental data in this work: ■ ref [28] □ ref [30]; ● ref [31]; ○ ref [34]; ★ this work.

### Figure S9

The deviation of DMF between the literature viscosity (*η*lit) and the calculated viscosity (*η*cal) using Eq.(8) correlated using the experimental data in this work: ■ ref [47] □ ref [20]; ● ref [14]; ○ ref [38]; ★ this work.

### Figure S10

Experimental viscosity data of [C8mim][OAc] with organic solvent of DMSO as a function of IL mole fraction at atmospheric pressure; ■, 303.15 K; □, 308.15 K; ●, 313.15 K; ○, 318.15 K; ▲, 323.15 K; △, 328.15 K; ▼, 333.15 K; ▽, 338.15 K; ◆, 343.15 K; ◇ 348.15 K.

### Figure S11

Experimental viscosity data of [C8mim][OAc] with organic solvent of DMA as a function of IL mole fraction at atmospheric pressure; ■, 303.15 K; □, 308.15 K; ●, 313.15 K; ○, 318.15 K; ▲, 323.15 K; △, 328.15 K; ▼, 333.15 K; ▽, 338.15 K; ◆, 343.15 K; ◇ 348.15 K.

### Figure S12

Experimental viscosity data of [C8mim][OAc] with organic solvent of DMF as a function of IL mole fraction at atmospheric pressure; ■, 303.15 K; □, 308.15 K; ●, 313.15 K; ○, 318.15 K; ▲, 323.15 K; △, 328.15 K; ▼, 333.15 K; ▽, 338.15 K; ◆, 343.15 K; ◇ 348.15 K.
